# Supplementary material for: Effect of copper salts on hydrothermal oxidative decarboxylation: a study of phenylacetic acid
Source: Royal Society of Chemistry journal article supplement (doi:10.1039/c9cc09825a), 2020-01-01
Supplement: c9cc09825a1.pdf [file c9cc09825a1.pdf]

Electronic Supplementary Information (ESI)

*Effect of copper salts on hydrothermal oxidative decarboxylation: A  
study of phenylacetic acid*

Xuan Fu,<sup>a</sup> Megan Jamison,<sup>a</sup> Aaron M. Jubb,<sup>b</sup> Yiju Liao,<sup>a</sup> Alexandria Aspin,<sup>a</sup> Kyle Hayes,<sup>a</sup>

Christopher R. Glein,<sup>c</sup> Ziming Yang <sup>\*a</sup>

<sup>a</sup> Department of Chemistry, Oakland University, Rochester, MI 48309, USA

<sup>b</sup> U.S. Geological Survey, 12201 Sunrise Valley Drive, Reston, VA 20192, USA

<sup>c</sup> Space Science and Engineering Division, Southwest Research Institute, San Antonio, TX 78228,

USA

\* Correspondence: [zimingyang@oakland.edu](mailto:zimingyang@oakland.edu)

## 22 I. EXPERIMENTAL SECTION

### 23 Materials

24 Benzyl alcohol (99%), benzoic acid (99%), benzaldehyde (>99%), phenylacetic acid  
25 (99%), *p*-tolylacetic acid (99%), and *p*-fluorophenylacetic acid (98%) were obtained from Sigma  
26 Aldrich and used as received. Copper (II) salts including copper chloride (99%), copper acetate  
27 (98%), copper sulfate (98%), and copper trifluoromethanesulfonate (98%) were purchased from  
28 Sigma Aldrich, whereas copper nitrate (>99%) was purchased from Fisher Chemicals. Magnesium  
29 nitrate (>99%), zinc nitrate (98%), and nickel (II) nitrate (>99%) were all obtained from Sigma  
30 Aldrich. Dichloromethane (99.9%) was obtained from VWR and *n*-dodecane (99%) was purchased  
31 from Sigma Aldrich. Deionized water was obtained from a Barnstead Nanopure system with a  
32 resistivity of 18.2 MΩ·cm. Fused silica glass tubes were obtained from GM Associates, Inc. and  
33 rinsed with dichloromethane before use.

### 34 Methods

35 Hydrothermal experiments were performed in fused silica glass tubes (2 mm inner diameter  
36 and 6 mm outer diameter) using a previously developed method.<sup>1</sup> In short, 0.03 mmol of  
37 phenylacetic acid was weighed and carefully transferred into the tube through a Pasteur pipette. A  
38 0.3 mL aliquot of metal salts solution (0.2 molal in degassed and deionized water) was  
39 subsequently added using a gas-tight micro-syringe, to reach a molar ratio of 1:2 between  
40 phenylacetic acid and the divalent metal ions. In sodium salts experiments, the anions  
41 concentrations were kept the same as those in copper salts experiments, with a molar ratio of 1:4  
42 between phenylacetic acid and the sodium ions, except for sodium sulfate (1:2). The headspace air  
43 in silica tubes was evacuated through three pump-freeze-thaw cycles and the tubes were sealed  
44 with an oxyhydrogen flame under vacuum. The sealed tubes were then heated in a gas

45 chromatography (GC) oven at 200 °C for up to 6 hours. The pressure inside the tube was calculated  
46 to be ca. 15 bar ( $P_{\text{sat}}$  at 200 °C) based on thermodynamics calculations using SUPCRT92.<sup>2</sup>

47 The hydrothermal experiments were quenched by submerging the silica tubes in a cold  
48 water bath and the cooling process took less than one minute. The tubes were cut open and the  
49 products were quickly transferred into a 3.0 mL dichloromethane solution with *n*-dodecane as the  
50 GC internal standard. Reaction products were analyzed using an Agilent 7820 GC equipped with  
51 an autosampler (Agilent 7650) and a flame-ionization detector, and the product identification was  
52 verified by a GC-MS (Agilent 7890A/5975C). Product concentrations were quantified by GC  
53 calibration curves that were generated with standard solutions. The GC oven was programmed to  
54 start at 50 °C (hold 8 min), ramp at 10 °C min<sup>-1</sup> to 220 °C (hold 10 min), and ramp at 20 °C min<sup>-1</sup>  
55 to 300 °C (hold 5 min). The injector temperature was set at 300 °C.

56 The absorbance of dissolved copper (II) in solution before and after the hydrothermal  
57 reaction was measured using a UV-Vis spectrometer (Agilent). To minimize oxidation of copper  
58 (I) to copper (II) by air, the aqueous samples after the hydrothermal process were quickly extracted  
59 with 3.0 mL DI water, filtered through a 0.45 µm-membrane filter, and transferred to a cuvette  
60 before the spectroscopy analysis in a wavelength range of 500 to 900 nm. The absorbance of  
61 copper (II) was measured at 799 nm, and the copper (II) concentration was determined based on a  
62 calibration curve built with copper (II) standards. Concentration of copper (I) was not quantified  
63 because of the low solubility of the copper (I) salts, and insoluble solids were observed after the  
64 reaction, which are consistent with formation of copper (I) products.

65 Raman measurements were collected through the wall of sealed silica tubes using a Horiba  
66 Xplora Plus Raman microscope, similar to a previous approach.<sup>3</sup> In a typical measurement, the  
67 laser was first focused on the top of the silica tube above a region containing fluid. The stage was

68 then raised 1500  $\mu\text{m}$  to bring the focus of the laser  $\sim 500$   $\mu\text{m}$  within the tube. All Raman spectra  
69 were acquired using a 473 nm laser with perpendicular polarization through a 50x long-working  
70 distance objective (0.50 NA) with  $\sim 25$  mW power at the sample surface, a 100  $\mu\text{m}$  confocal  
71 pinhole, a 100  $\mu\text{m}$  monochromator slit, a 1200 groove  $\text{mm}^{-1}$  dispersive grating, 60 s acquisition  
72 time, and 3 co-averaged scans. Each Raman spectrum was subjected to a 10th-order polynomial  
73 smoothing algorithm following collection. Displayed spectra have had the water signal from a  
74  $\text{CuCl}_2$  solution subtracted following smoothing. The phonon band at  $520.7$   $\text{cm}^{-1}$  from crystalline  
75 silicon was used to calibrate all Raman spectra.

76

77

## 78 II. FIGURES AND TABLES

79

80 **Figure S1.** Absorbance of copper (II) in standard solutions with a concentration ranging from  
81 0.002, 0.005, 0.01 to 0.05 molal.

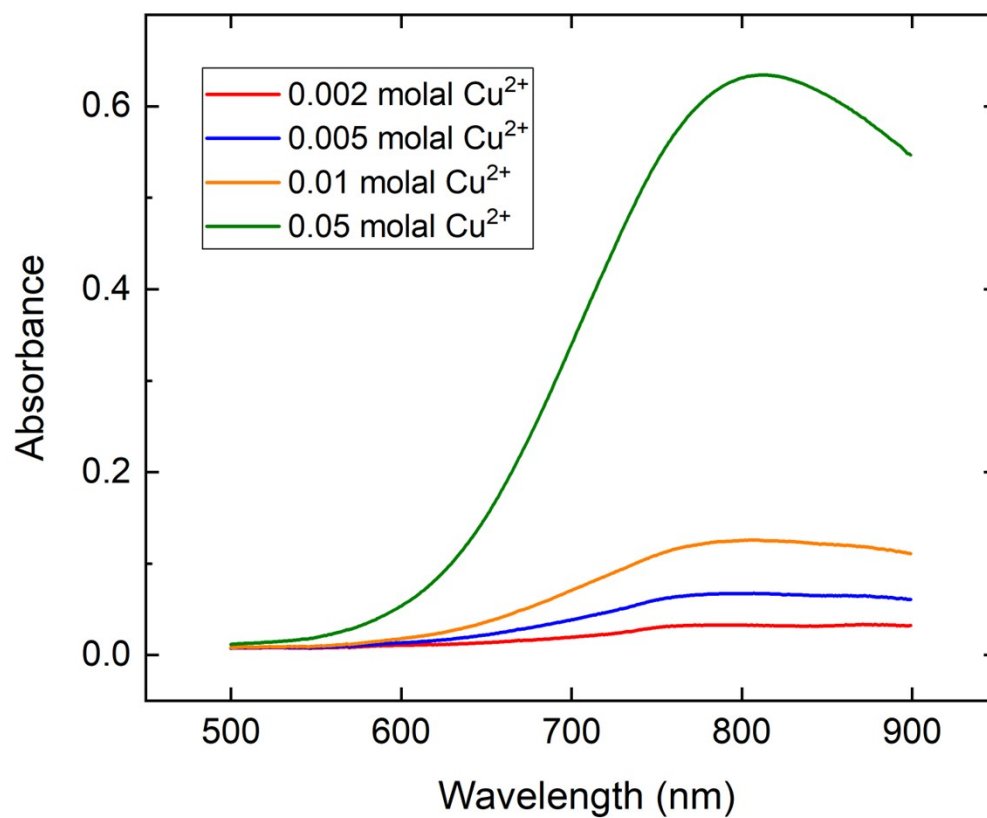

82

83

84

85 **Figure S2.** Calibration curve built with copper (II) absorbance versus copper (II) concentrations.

86 The absorbance of copper (II) was measured at the wavelength of 799 nm.

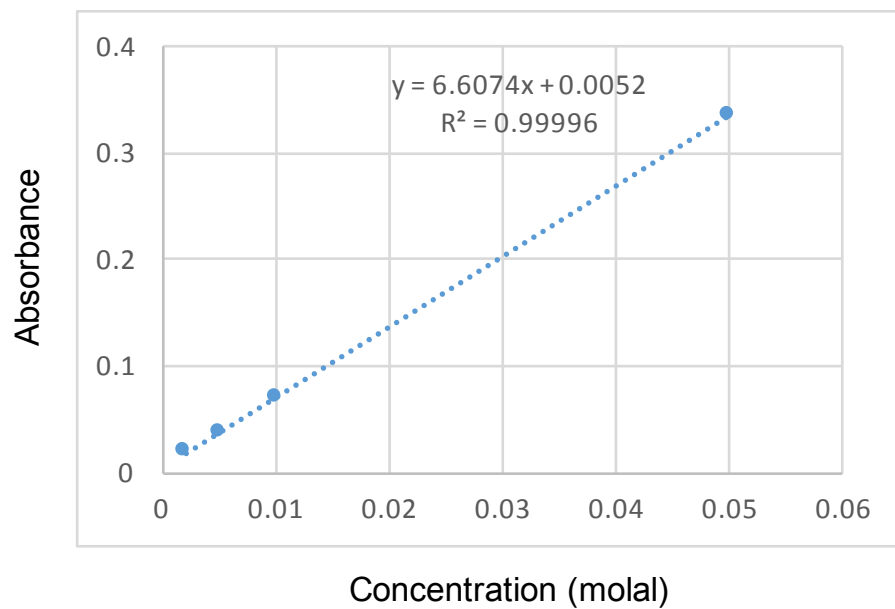

87

88

89

90

91 **Figure S3.** Absorbance of copper (II) in solutions before (green curve) and after the hydrothermal  
92 experiments of PAA with copper chloride (blue curve), copper sulfate (orange curve), and copper  
93 nitrate (red curve) at 200 °C and 15 bar after 2 hours. The starting concentrations of PAA and  
94 copper (II) were 0.1 and 0.2 molal, respectively. The samples were diluted 10 times before the  
95 UV-Vis analysis to ensure the absorbance values were not higher than 1.

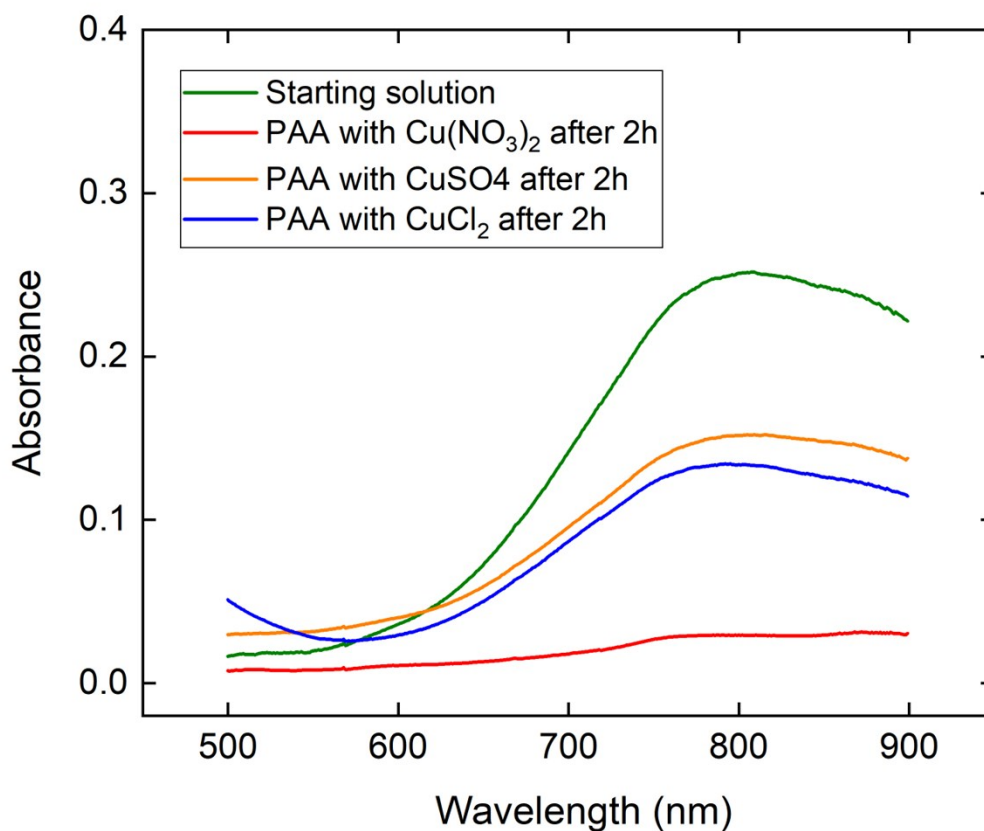

96

97

98 **Table S1.** Major products concentration and reaction conversion of PAA with 2 and 4 equivalent  
 99 of copper (II) salts in H<sub>2</sub>O at 200 °C and 15 bar after 2 hours. The starting concentration of PAA  
 100 was 0.1 molal. The initial concentrations of 2 and 4 equivalent of copper (II) were 0.2 and 0.4  
 101 molal, respectively.

102

|     | Copper<br>(II) salts                        | Copper<br>(II)/PAA<br>ratio | PAA<br>decomposition<br>(%) | Benzaldehyde<br>(mmolal) | Benzoic acid<br>(mmolal) | Remaining<br>Cu <sup>2+</sup><br>(molal) |
|-----|---------------------------------------------|-----------------------------|-----------------------------|--------------------------|--------------------------|------------------------------------------|
| PAA | CuCl <sub>2</sub>                           | 2                           | 42.2                        | 30.4                     | 10.7                     | 0.02                                     |
| PAA | CuCl <sub>2</sub>                           | 4                           | 68.9                        | 61.8                     | 7.1                      | -                                        |
| PAA | CuSO <sub>4</sub>                           | 2                           | 34.1                        | 12.0                     | 20.8                     | 0.02                                     |
| PAA | CuSO <sub>4</sub>                           | 4                           | 44.7                        | 25.7                     | 18.9                     | -                                        |
| PAA | Cu(OAc) <sub>2</sub>                        | 2                           | 39.4                        | 24.7                     | 14.7                     | -                                        |
| PAA | Cu(OAc) <sub>2</sub>                        | 4                           | 66.6                        | 49.2                     | 17.4                     | -                                        |
| PAA | Cu(NO <sub>3</sub> ) <sub>2</sub>           | 2                           | 71.3                        | 8.7                      | 62.6                     | 0.01                                     |
| PAA | Cu(OTf) <sub>2</sub>                        | 2                           | 14.6                        | 4.6                      | 9.1                      | -                                        |
| PAA | Cu(OTf) <sub>2</sub><br>+ NaNO <sub>3</sub> | 2                           | 53.7                        | 10.9                     | 42.8                     | -                                        |

103

104

105

106 **References:**

- 107 1. Yang, Z.; Fu, X., An experimental protocol for studying mineral effects on organic  
108 hydrothermal transformations. *JoVE* **2018**, (138), e58230.
- 109 2. Johnson, J. W.; Oelkers, E. H.; Helgeson, H. C., SUPCRT92: A software package for  
110 calculating the standard molal thermodynamic properties of minerals, gases, aqueous species, and  
111 reactions from 1 to 5000 bar and 0 to 1000°C. *Computers & Geosciences* **1992**, 18 (7), 899-947.
- 112 3. Alrowaie, M. A.; Jubb, A. M.; Schimmelmann, A.; Mastalerz, M.; Pratt, L. M., Hydrous  
113 heating experiments at 130 °C yield insights into the occurrence of hydrogen sulfide and light  
114 alkanes in natural gas reservoirs. *Organic Geochemistry* **2019**, 137, 103901.
- 115
